# Supplementary material for: Intra-pulmonary and intra-cardiac shunts in adult COVID-19 versus non-COVID ARDS ICU patients using echocardiography and contrast bubble studies (COVID-Shunt Study): a prospective, observational cohort study
Source: medRxiv preprint, doi:10.1101/2022.08.04.22278445, version 1 (2022-08-06)
Supplement: Supplemental Figure 2 [file 278445_file10.docx]

Supplemental Figure 2. COVID-19 ARDS Right-to-Left Shunt Positivity Rate


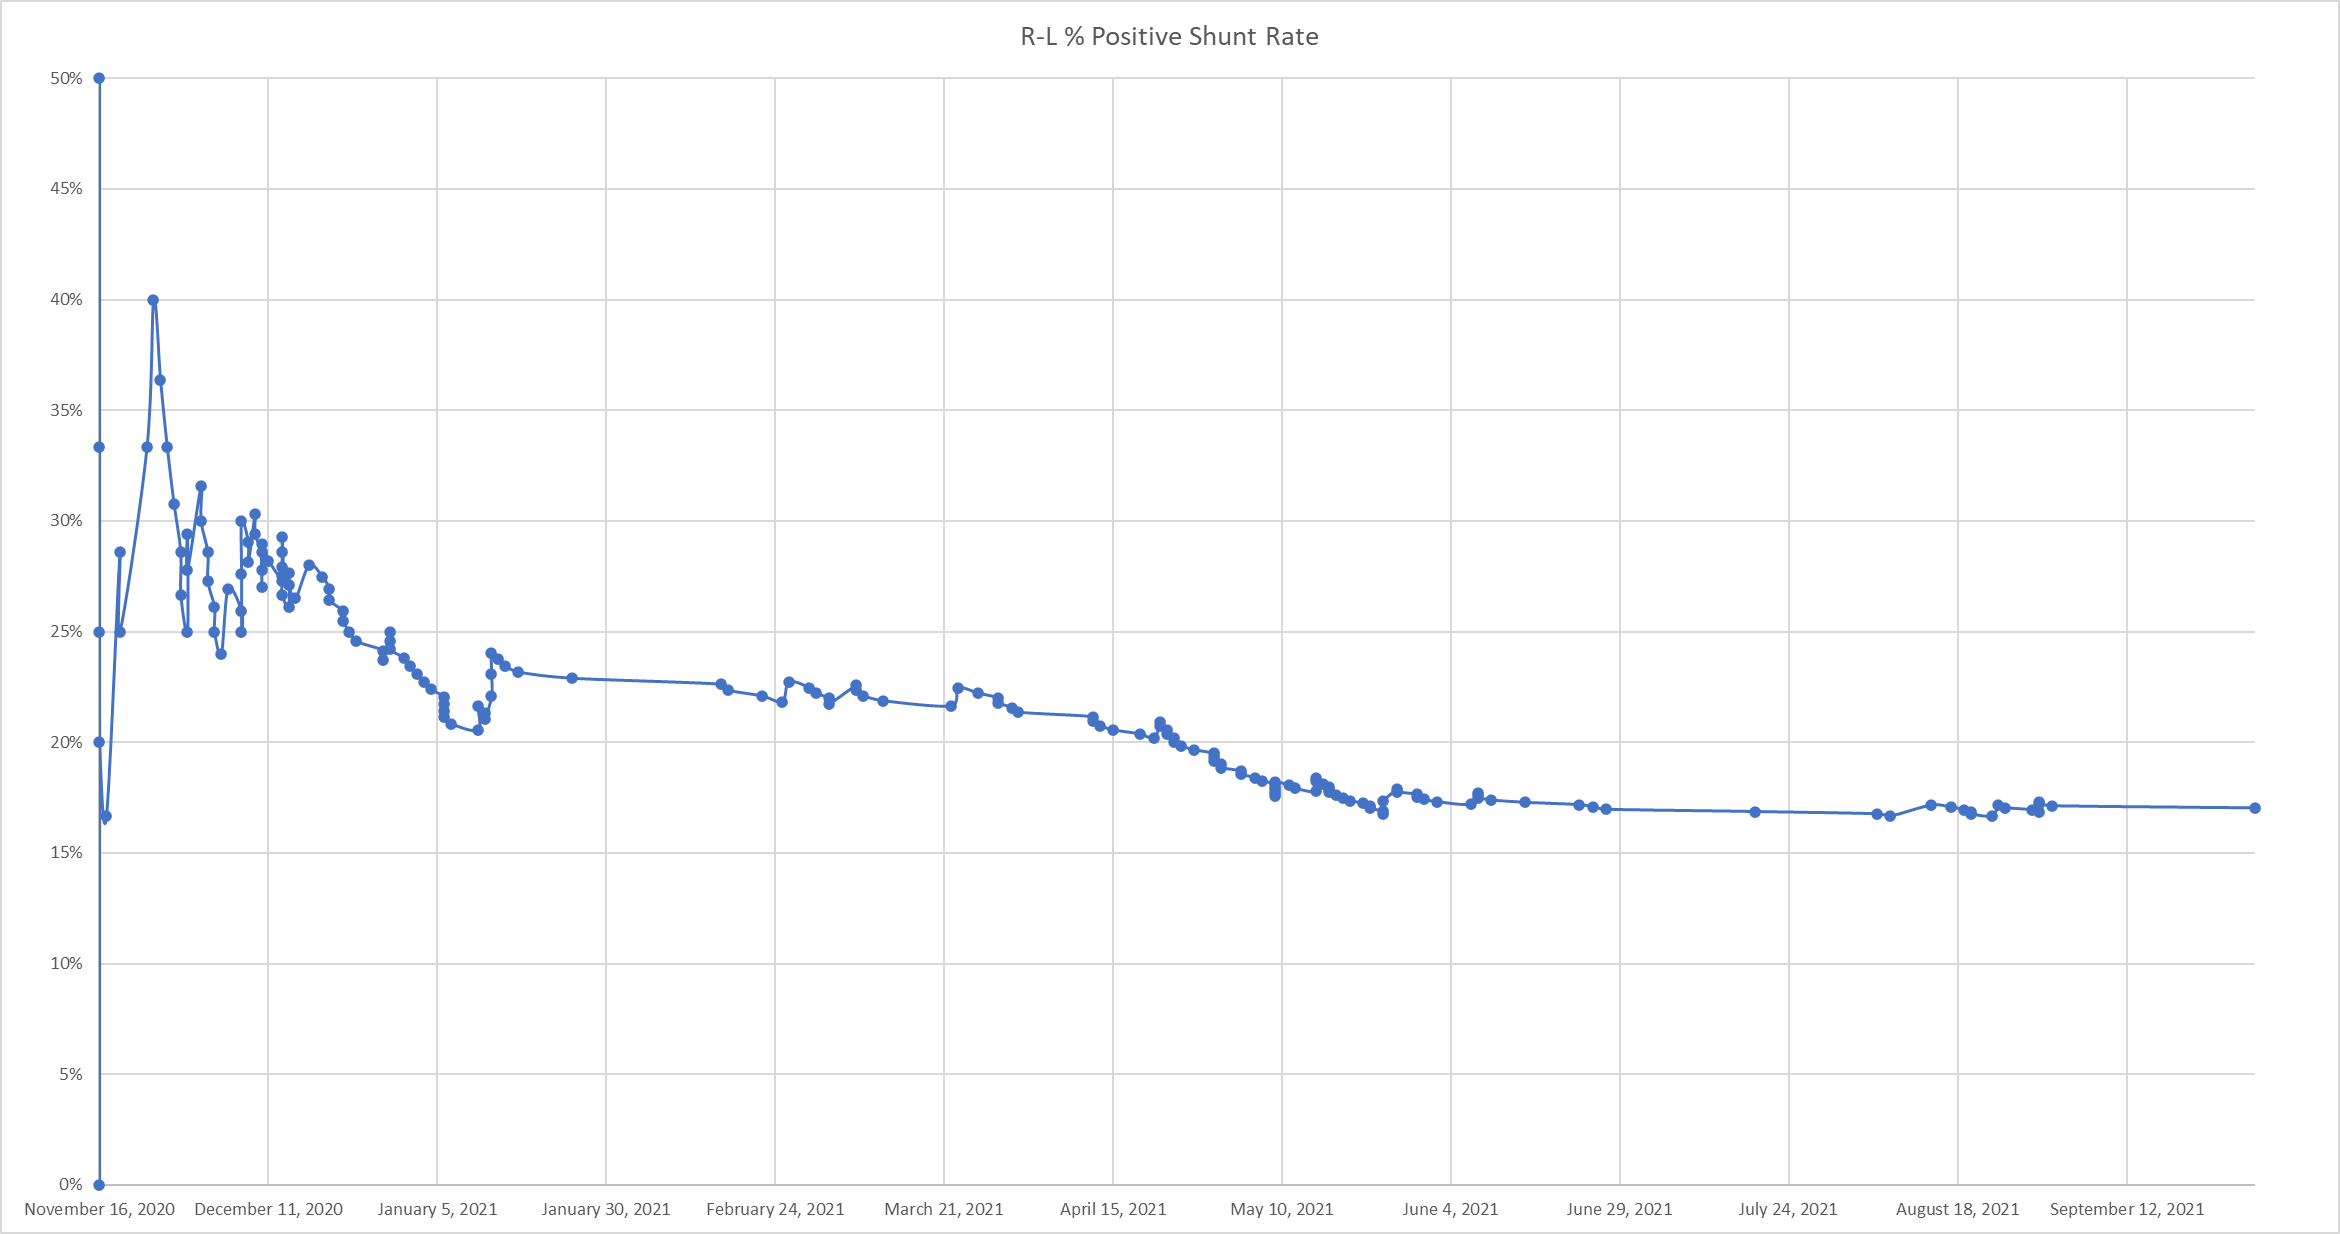


ARDS: acute respiratory distress syndrome; COVID-19: coronavirus disease-2019; R-L: right-to-left-shunt
